# Supplementary material for: A high-performance broadband phototransistor array of a PdSe2/SOI Schottky junction
Source: Royal Society of Chemistry journal article supplement (doi:10.1039/d3nr06643f), 2024-01-01
Supplement: d3nr06643f1.pdf [file d3nr06643f1.pdf]

## High-performance broadband phototransistor array of PdSe<sub>2</sub>/SOI

### Schottky junction

Yexin Chen<sup>1,4</sup>, Qinghai Zhu<sup>1,4</sup>, Jiabao Sun<sup>2</sup>, Yijun Sun<sup>2</sup>, Nobutaka Hanagata<sup>3</sup>, and Mingsheng Xu<sup>1</sup> (✉)

<sup>1</sup> College of Integrated Circuits, State Key Laboratory of Silicon and Advanced Semiconductor Materials, Zhejiang University, Hangzhou 310027, China

<sup>2</sup> College of Information Science & Electronic Engineering, Zhejiang University, 38 Zheda Road, Hangzhou 310027, China

<sup>3</sup> Research Center for Functional Materials and Nanotechnology Innovation Station, National Institute for Materials Science, 1-2-1 Sengen, Tsukuba, Ibaraki 305-0047, Japan

<sup>4</sup> Yexin Chen and Qinghai Zhu contributed equally to this work.

Address correspondence to Mingsheng Xu, [msxu@zju.edu.cn](mailto:msxu@zju.edu.cn)

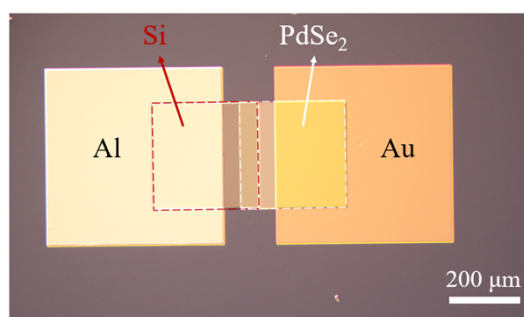

**Fig. S1** Optical image of the fabricated PdSe<sub>2</sub>/Si phototransistor.

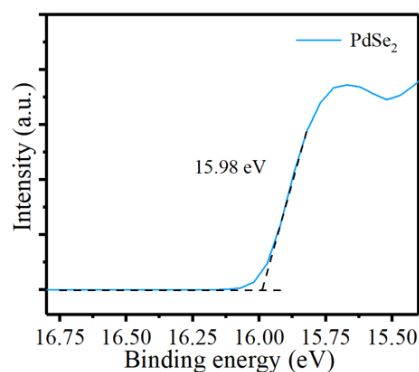

**Fig. S2** UPS spectra of PdSe<sub>2</sub> film. The calculation formula of Fermi energy level of PdSe<sub>2</sub> is as

follows:  $E_f = 21.22 \text{ eV} - 15.98 \text{ eV} = 5.24 \text{ eV}$ .

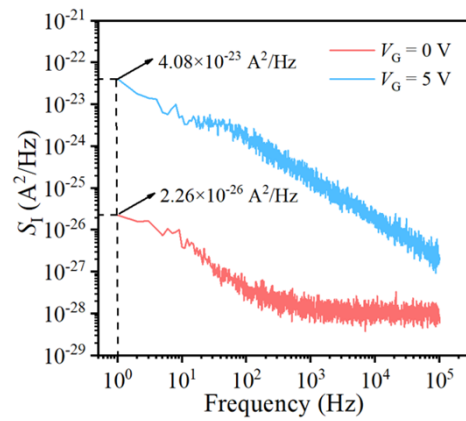

**Fig. S3** Noise spectral density versus frequency for PdSe<sub>2</sub>/Si phototransistor at gate voltages of 0 V and 5 V.

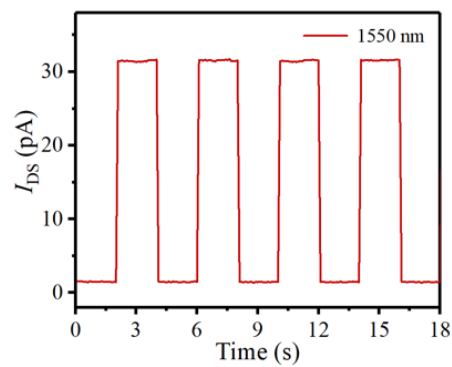

**Fig. S4** Time-dependent photocurrent of PdSe<sub>2</sub>/Si phototransistor under 1550 nm illumination at  $V_G = 0 \text{ V}$  and  $V_{DS} = 0 \text{ V}$ .

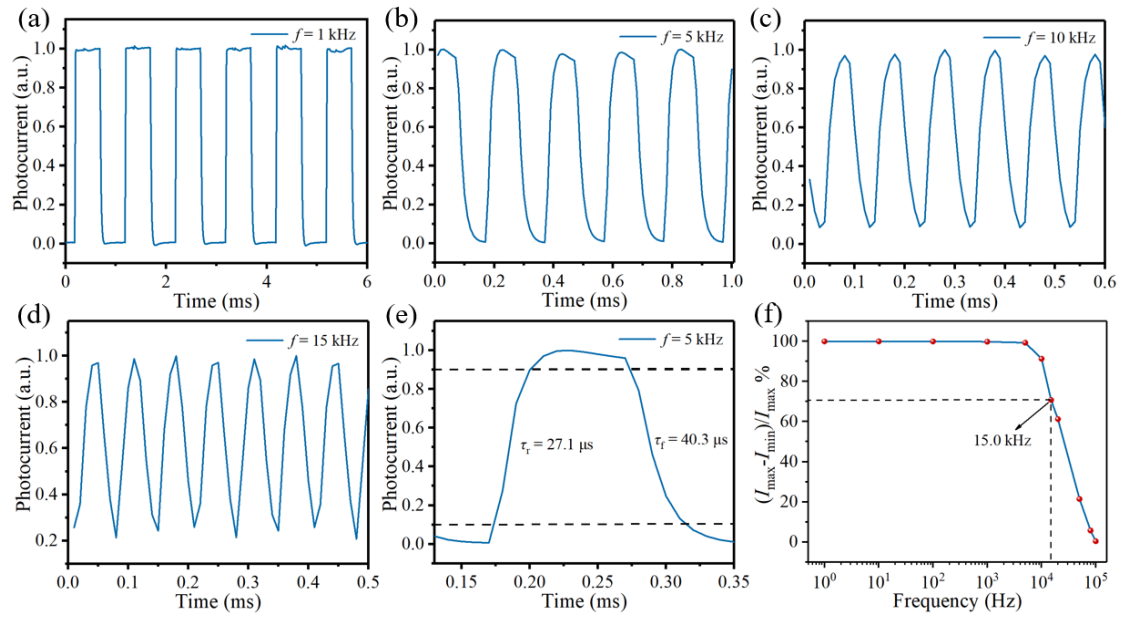

**Fig. S5** Photoresponse characteristics of PdSe<sub>2</sub>/Si phototransistor to pulsed light irradiation at frequencies of (a) 1 kHz, (b) 5 kHz, (c) 10 kHz and (d) 15 kHz under 808 nm illumination. (e) Rising and falling edges for estimating the rise time ( $\tau_r$ ) and the fall time ( $\tau_f$ ) of PdSe<sub>2</sub>/Si phototransistor at pulsed light frequency of 5 kHz under 808 nm illumination ( $V_G = 0$  V and  $V_{DS} = 0$  V). (f) Frequency response characteristic of PdSe<sub>2</sub>/Si phototransistor.
